# Supplementary material for: Poly(lactic acid) and Nanocrystalline Cellulose Methacrylated Particles for Preparation of Cryogelated and 3D-Printed Scaffolds for Tissue Engineering
Source: MDPI journal article supplement (doi:10.3390/polym15030651), 2023-01-27
Supplement: s1 [file s1]

# Poly(lactic acid) and nanocrystalline cellulose methacrylated particles for preparation of 3D printed hydrogel scaffolds for tissue engineering

Mariia Leonovich <sup>1</sup>, Viktor Korzhikov-Vlakh <sup>1</sup>, Antonina Lavrentieva <sup>2</sup>, Iliyana Pepelanova<sup>2</sup>, Evgenia Korzhikova-Vlakh <sup>1,3</sup>, Tatiana Tennikova <sup>1\*</sup>

<sup>1</sup> Institute of Chemistry, Saint Petersburg State University, Peterhoff, Universitetskii pr. 26, 198504 St. Petersburg, Russia; v.korzhikov-vlakh@spbu.ru

<sup>2</sup> Institute of Technical Chemistry, Gottfried-Wilhelm-Leibniz University of Hannover, 30167 Hannover, Germany; lavrentieva@iftc.uni-hannover.de

<sup>3</sup> Institute of Macromolecular Compounds, Russian Academy of Sciences, St. Petersburg 199004, Russia; vlakh@mail.ru

\* Correspondence: [tennikova@mail.ru](mailto:tennikova@mail.ru)

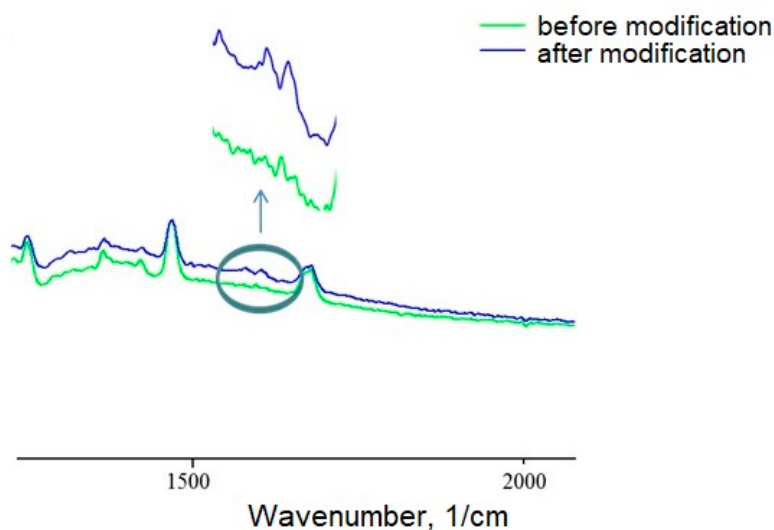

**Figure S1.** Raman spectrum of PLA (green line) and PLA-MA (blue line). Raman spectra were recorded with T64000 Horiba Scientific spectrometer (Kyoto, Japan).

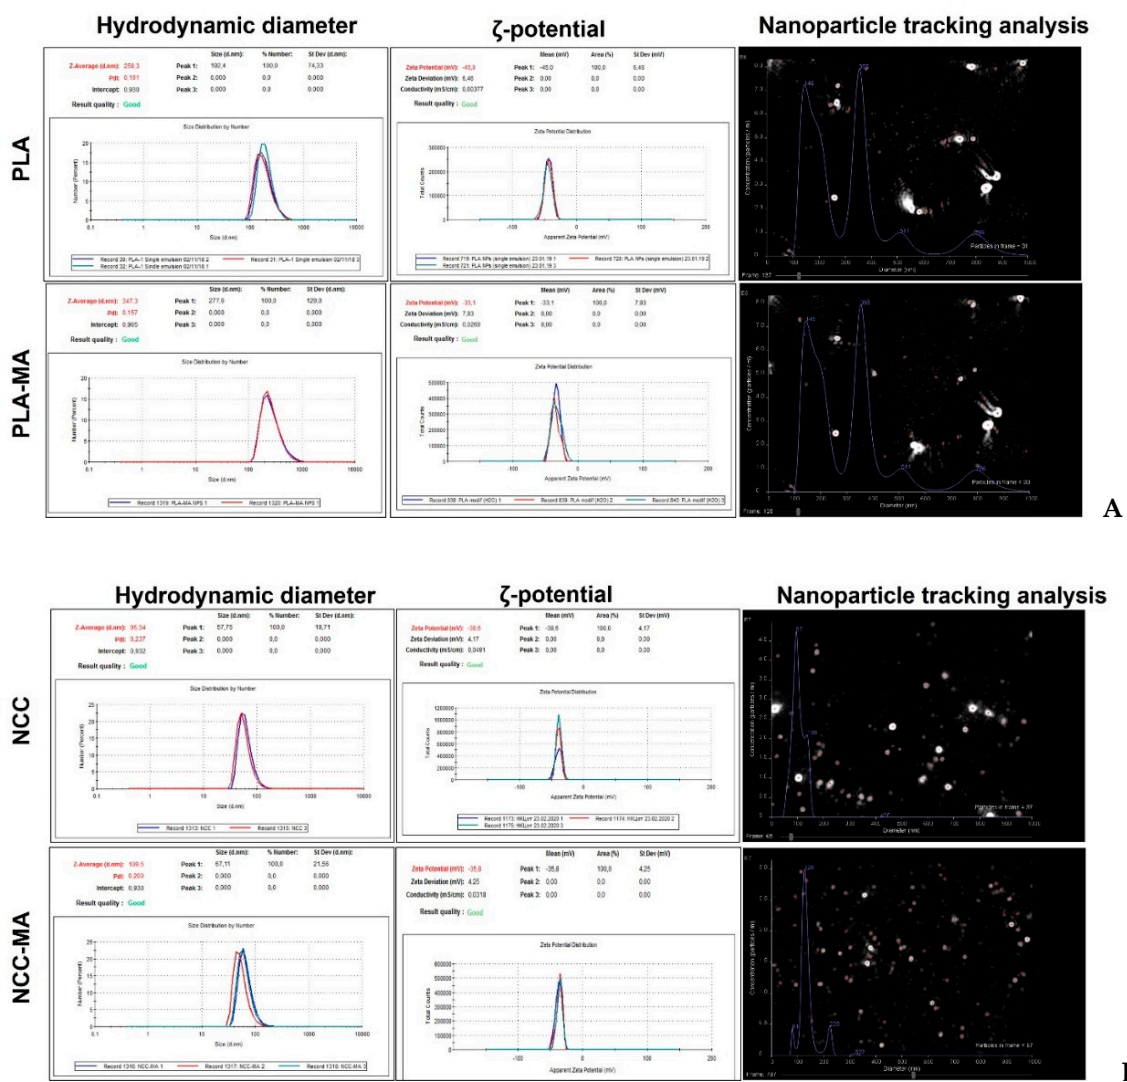

**Figure S2.** Non-methacrylated and methacrylated particles characteristics: (A) – PLA and PLA-MA; (B) – NCC and NCC-MA.

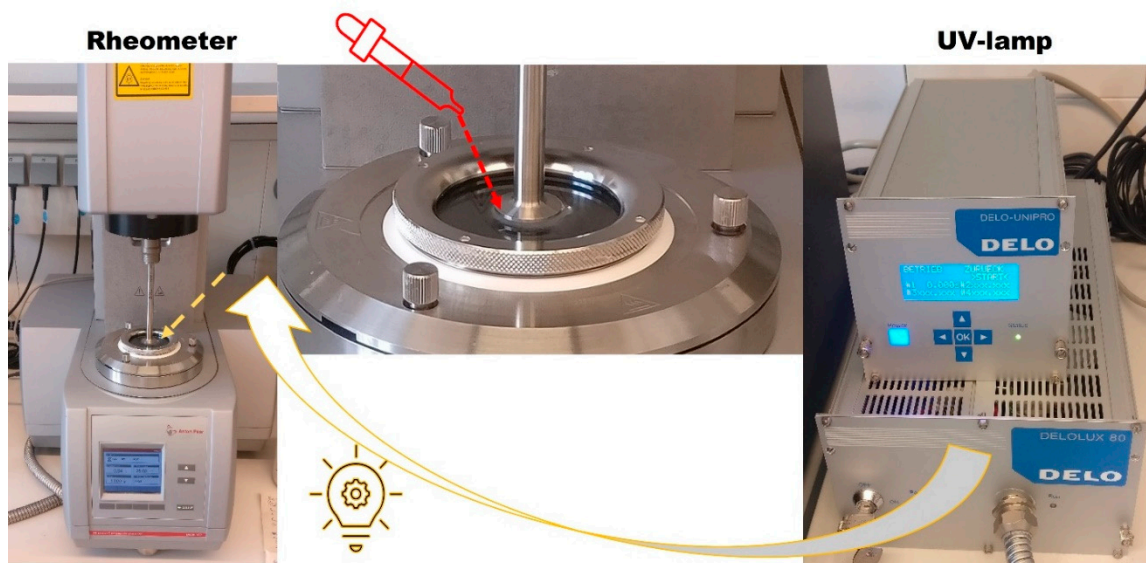

**Figure S3.** The scheme of rheological experiment, which was applied for testing of interparticle cross-linking.

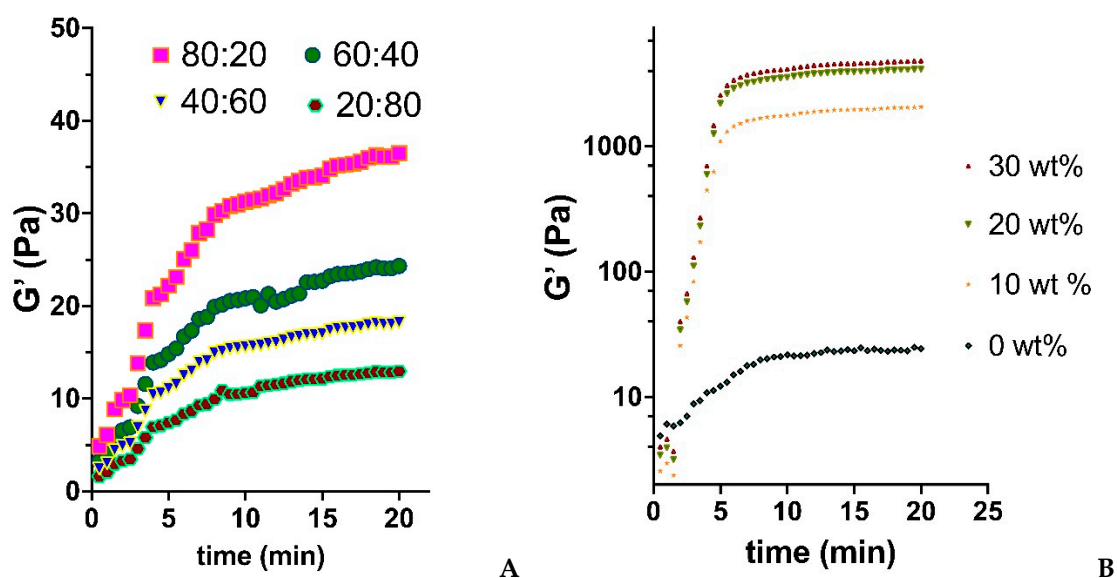

**Figure S4.** Results of rheological experiment: effect of PLA-MA and NCC-MA weight ratios (A) and Gel-MA concentration (B) on storage modulus increase during 10 min of exposure to UV-light and thereafter.

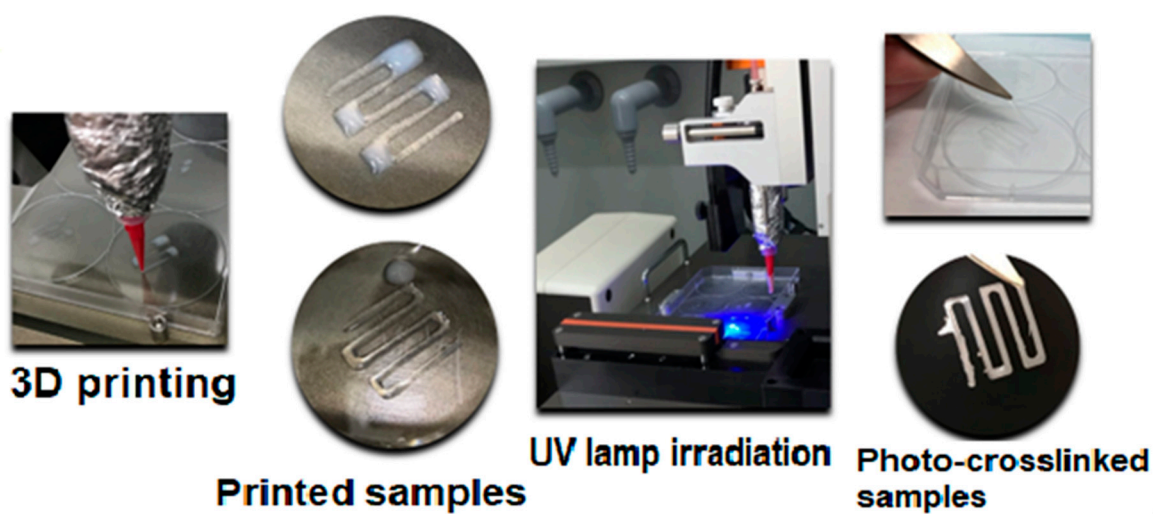

**Figure S5.** The scheme of 3D printing with application of particles as photo-curable ink.
